# Supplementary material
Source: PubMed Central journal article supplement (PMC4135289)
Supplement: 97320630010419S1.pdf [file 97320630010419S1.pdf]

## Supplementary material:

**Table 1:** Antibiotic sensitivity/resistance pattern of *E. coli* strains isolated from Urine sample (n=40)

| Antibiotic Tested | Sensitive (%) | Resistant(%) |
|-------------------|---------------|--------------|
| Ampicillin        | 13 (32.5)     | 27 (67.5)    |
| Nitrofurantoin    | 19 (47.5)     | 21 (52.5)    |
| Gentamicin        | 12 (30)       | 28 (70)      |
| Amikacin          | 18 (45)       | 22 (55)      |
| Ciprofloxacin     | 14 (35)       | 26 (65)      |
| Augmentin         | 09 (22.5)     | 31 (77.5)    |
| Imipenem          | 27 (67.5)     | 13 (32.5)    |
| Tazocin           | 35 (87.5)     | 05 (12.5)    |

**Table 2:** Antibiotic resistance profiles of *E. coli* isolated from urine specimens

| Number of antibiotics tested | No. & Percent of strains showing resistance |
|------------------------------|---------------------------------------------|
| one antibiotic               | 1 (2.5%)                                    |
| Two antibiotics              | 4 (10%)                                     |
| Three antibiotics            | 6 (15%)                                     |
| Four antibiotics             | 6 (15%)                                     |
| Five antibiotics             | 5 (12.5%)                                   |
| Six antibiotics              | 7 (17.5%)                                   |
| Seven antibiotics            | 8 (20%)                                     |

**Table 2** shows that number & percentage of bacterial strains showing resistance to antibiotics increases with increase in the number of antibiotics. It may be the confounding effect of more than one antibiotics or a reaction of one antibiotic in combination to the other. In fact, it can also be revealed that individual antibiotic is more specific and effective against a particular species of bacteria.
